# Supplementary material
Source: Springer Nature journal article supplement (https://www.springermedizin.de/resource/supplementary/12881_2010_664_MOESM4_ESM.pdf/9450844)

**A**

GRIA1vsGRIA2

GRIA1vsGRIA3

GRIA1vsGRIA4

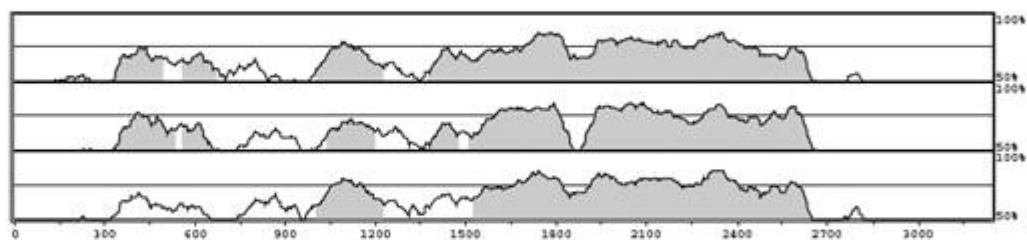**B**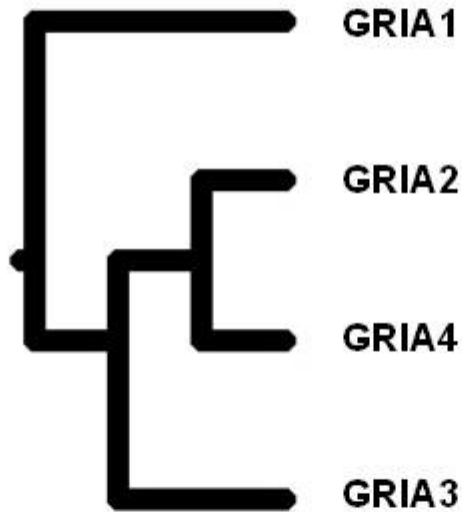

Supplement: MOESM4 [file 9450844]
